# Supplementary material for: A newly proposed endoscopic score system to evaluate the entire small bowel and predict the prognosis in Crohn’s disease
Source: PubMed Central journal article supplement — Nagoya J Med Sci. 2024 Nov;86(4):608–19. doi: 10.18999/nagjms.86.4.608 (PMC11704775; doi:10.18999/nagjms.86.4.608), 2024-11
Supplement: 2186-3326-86-0608-s001.pdf [file 2186-3326-86-0608-s001.pdf]

SUPPLEMENTAL INFORMATION

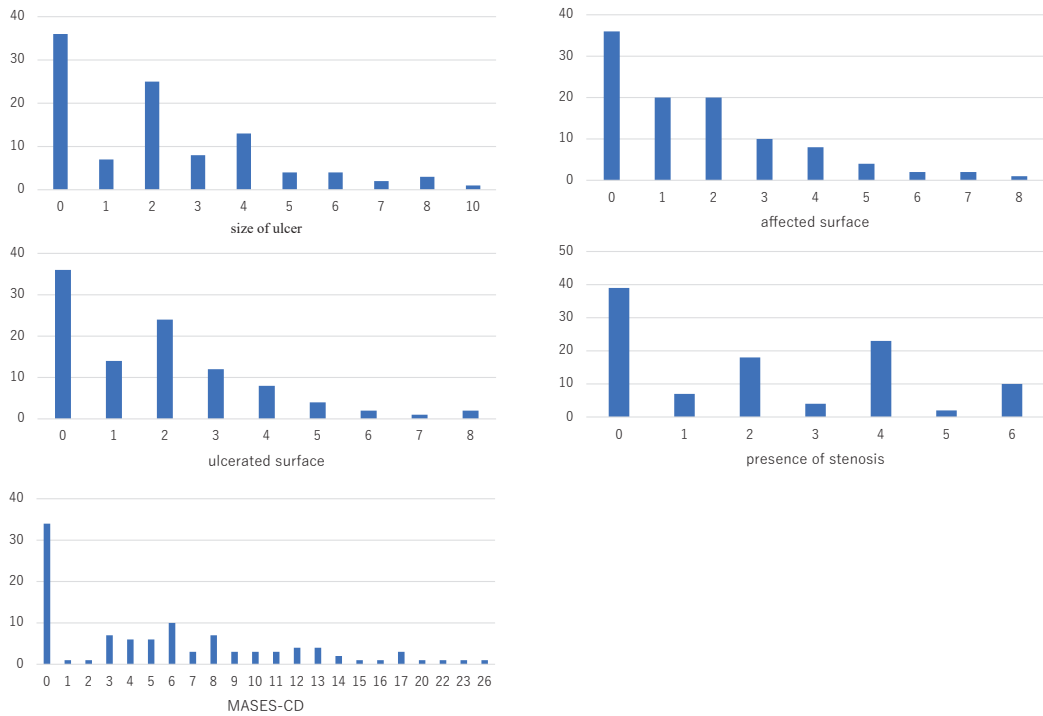

**Supplemental Figure**

MASES-CD: Modified Applied Simple Endoscopic Score for Crohn's Disease
